# Supplementary material for: Effective carbon dioxide uptake in a tailored covalent organic framework with pore size and active atom regulation
Source: Royal Society of Chemistry journal article supplement (doi:10.1039/d2nj00521b), 2022-01-01
Supplement: d2nj00521b1.pdf [file d2nj00521b1.pdf]

**Effective carbon dioxide uptake in tailored covalent organic framework with pore size and active atoms regulation**

Yuwei Zhang, <sup>\*\*</sup> Zhangfu Chen,<sup>+</sup> Qianyu Liu, Jieqiong Wan<sup>\*</sup>

<sup>a</sup> Laboratory of Preparation and Applications of Environmental Friendly Materials (Jilin Normal University), Ministry of Education, Changchun, 130103, China.

<sup>b</sup> Department of Chemical and Biomolecular Engineering, Yonsei University, 50 Yonsei-ro, Seodaemun-gu, Seoul120-749, South Korea.

<sup>c</sup> College of Chemistry and Chemical Engineering, Shanghai University of Engineering Science, Shanghai, 201620, China.

### **Instrumental characterization**

The infrared spectra were recorded from 500 to 4000  $\text{cm}^{-1}$  on an Avatar FT-IR 360 spectrometer by using KBr pellets. Elemental analyses were measured by an Elementar model vario EL cube analyzer. Field emission scanning electron microscopy was recorded on a SU8020 model HITACHI microscope. Powder X-ray diffraction data were performed on a PANalytical BV Empyrean diffractometer by depositing powder on glass substrate, from  $2\theta = 4.0^\circ$  to  $35^\circ$  with  $0.02^\circ$ . Thermogravimetric analysis (TGA) was performed on a TA Q500 thermogravimeter with the heating at a rate of  $10^\circ\text{C min}^{-1}$  from room temperature to  $800^\circ\text{C}$  under nitrogen. Nitrogen sorption isotherms were measured at 77 K with a JW-BK 132F analyzer.

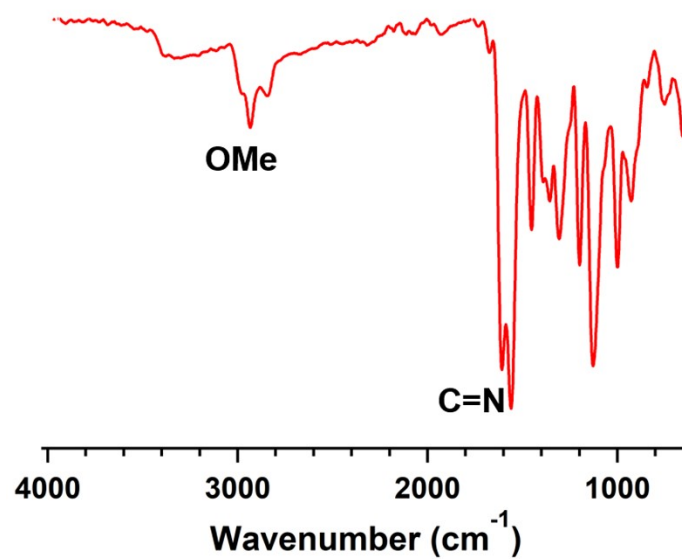

Fig. S1. FT IR spectrum of T-COF.

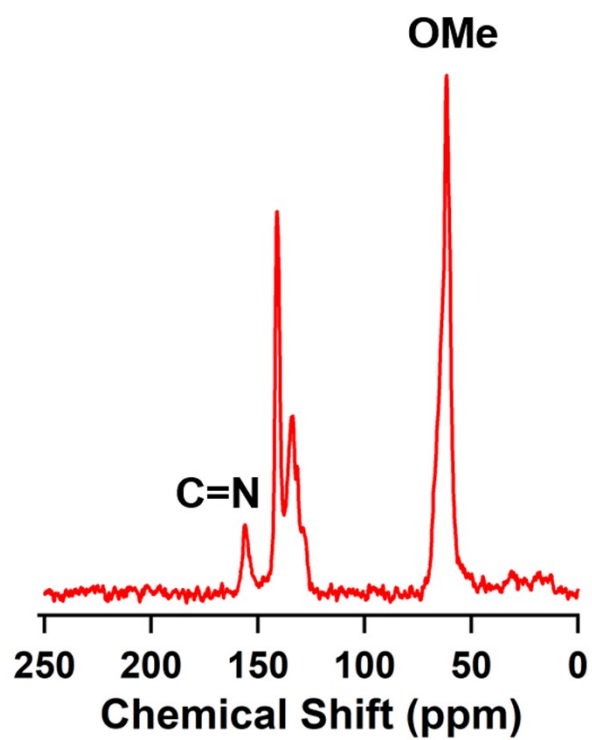

Fig. S2.  $^{13}\text{C}$  NMR spectrum of T-COF.

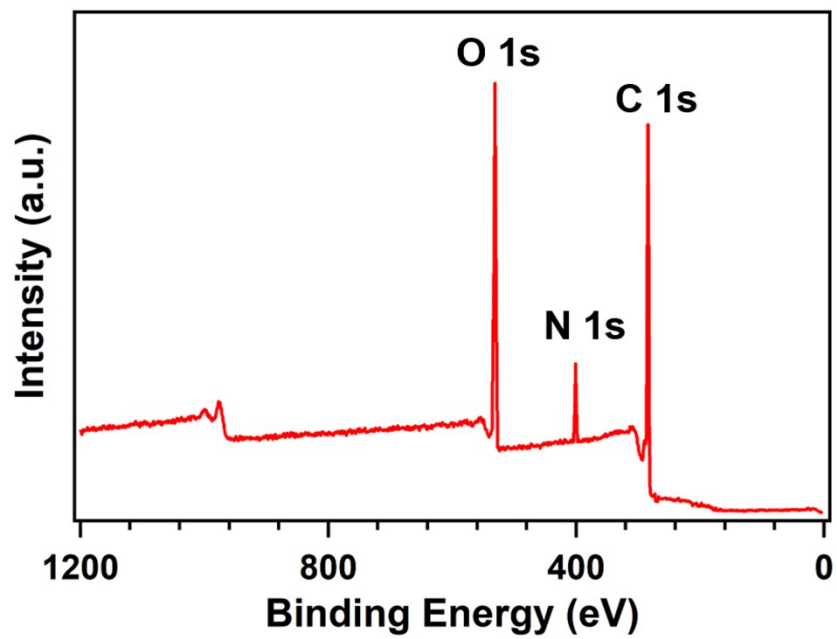

Fig. S3. XPS analysis of T-COF.

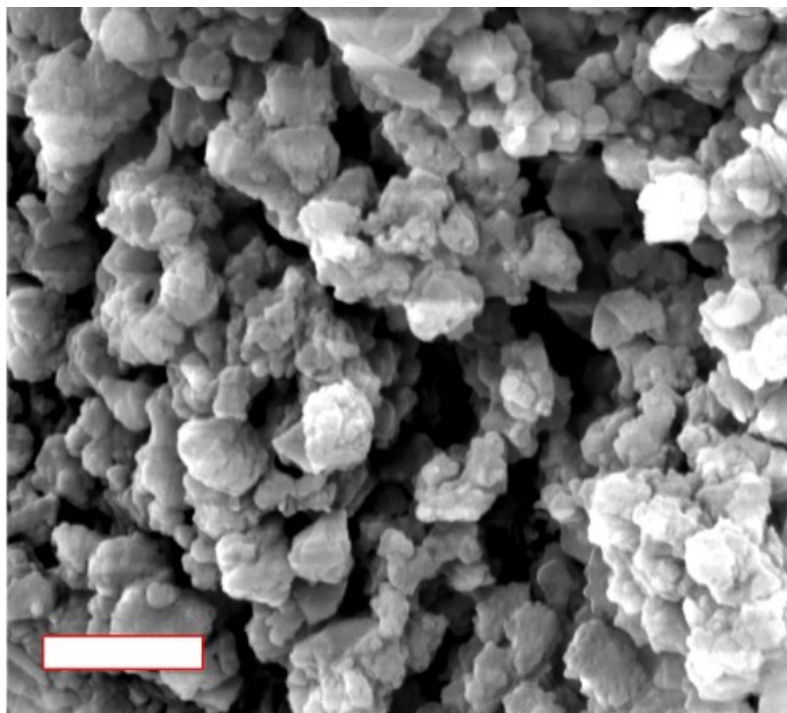

Fig. S4. SEM image of T-COF (scale bar: 5 $\mu$ m).

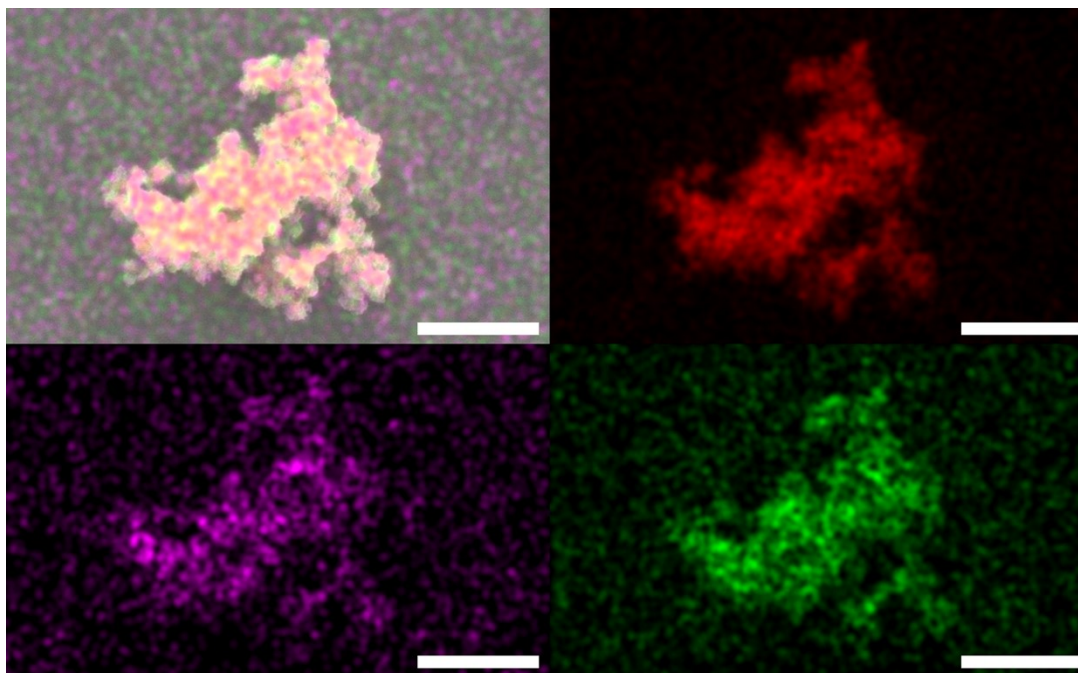

**Fig. S5.** EDS mapping of T-COF (scale bar: 3  $\mu\text{m}$ ).

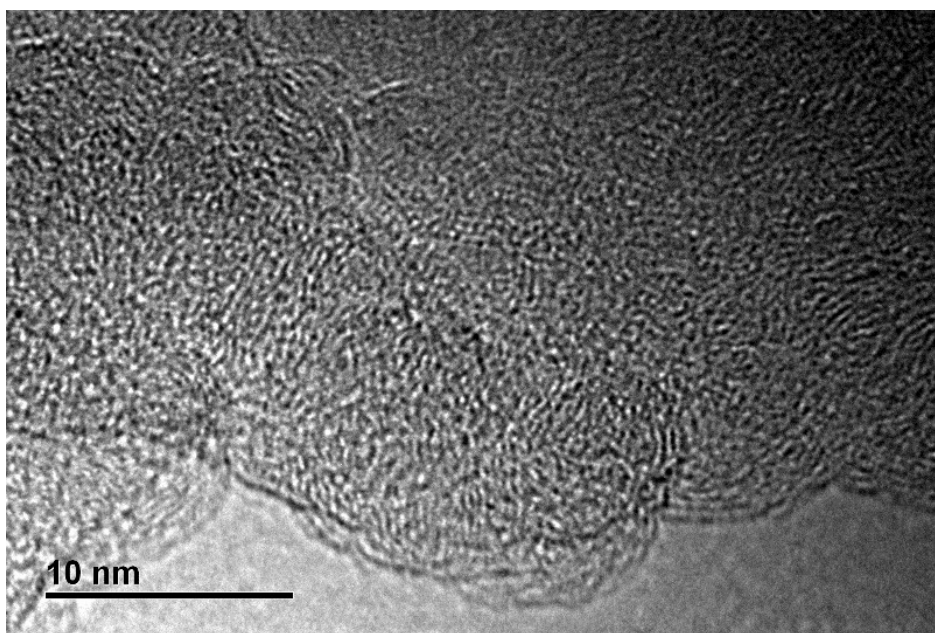

**Fig. S6.** TEM image of T-COF (scale bar: 10 nm).

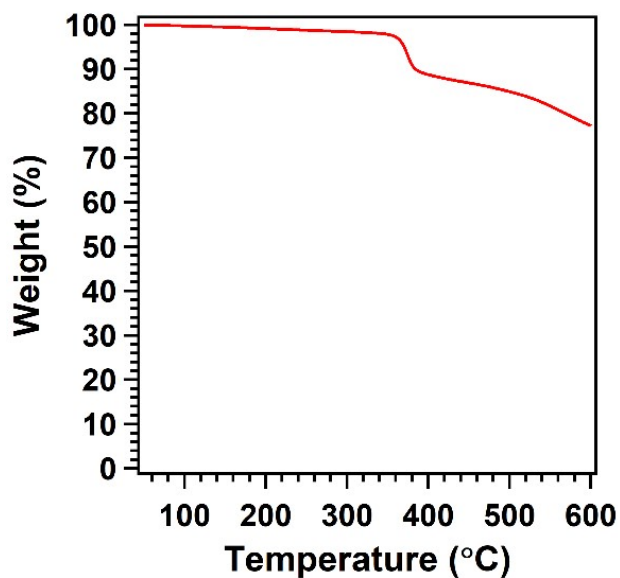

Fig. S7. TGA curve of T-COF.

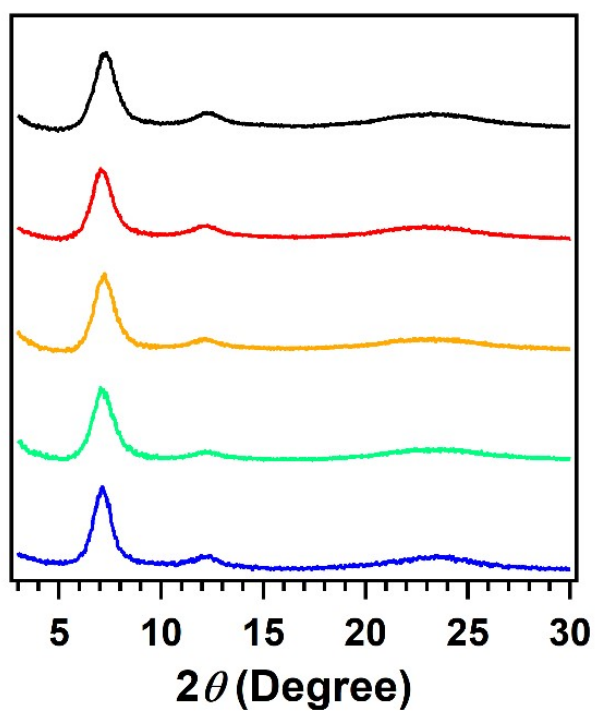

Fig. S8. PXRD patterns of T-COF. (As-synthesized: black; DMF: red; water: yellow; 1 M HCl: green; 1 M NaOH: blue).

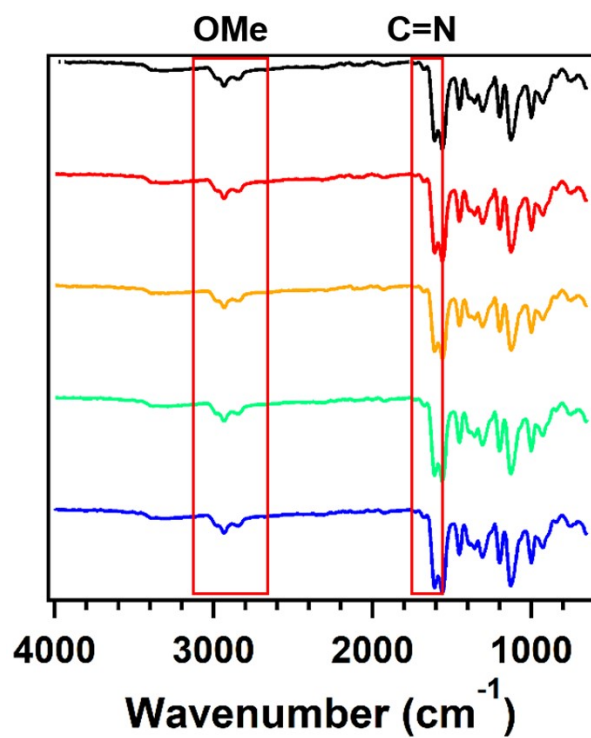

**Fig. S9.** FT-IR spectra of T-COF. (As-synthesized: black; DMF: red; water: yellow; 1 M HCl: green; 1 M NaOH: blue).
